# Supplementary material for: Qtlizer: comprehensive QTL annotation of GWAS results
Source: bioRxiv or medRxiv preprint supplement (doi:10.1101/495903), 2020-08-31
Supplement: Supplementary file [file media-1.pdf]

# Supplementary Material

|                                                                                                                                                                                                                                                                                     |   |
|-------------------------------------------------------------------------------------------------------------------------------------------------------------------------------------------------------------------------------------------------------------------------------------|---|
| <b>Supplementary Figure 1.</b> Proportions of consequence types of published GWAS hits according to the NHGRI-EBI Catalog of published GWAS (January 2018). .....                                                                                                                   | 2 |
| <b>Supplementary Figure 2.</b> For larger queries Qtlizer can be accessed using the Genehopper REST API. The script describes an example request in R. More info about the API can be found at <a href="http://www.genehopper.de/rest">http://www.genehopper.de/rest</a> . .....    | 3 |
| <b>Supplementary Figure 3.</b> For larger queries Qtlizer can be accessed using the Genehopper REST API. The script describes an example request in Perl. More info about the API can be found at <a href="http://www.genehopper.de/rest">http://www.genehopper.de/rest</a> . ..... | 4 |
| <b>Supplementary Table 1.</b> List of QTL datasets that were integrated into Qtlizer. ....                                                                                                                                                                                          | 5 |
| <b>Supplementary Table 2.</b> Members of the Cardiogenics Consortium. ....                                                                                                                                                                                                          | 8 |

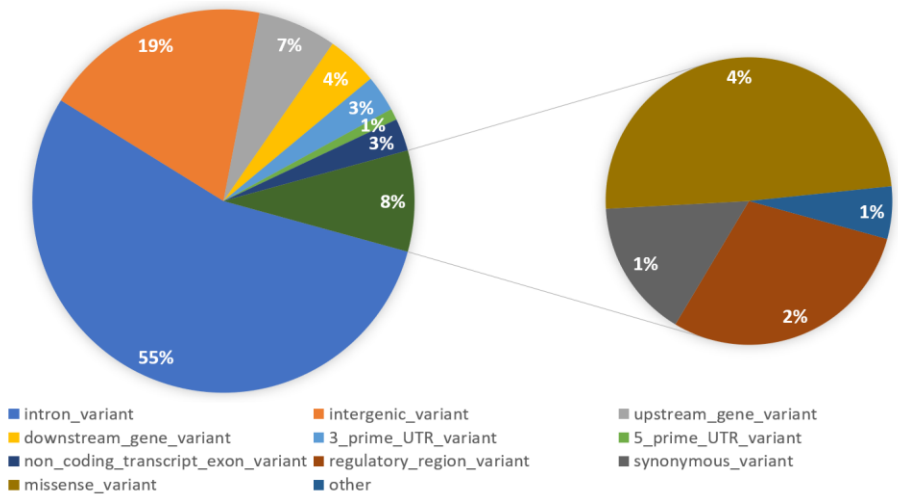

**Supplementary Figure 1.** Proportions of consequence types of published GWAS hits according to the NHGRI-EBI Catalog of published GWAS (January 2018).

```
# https://cran.r-project.org/web/packages/htr/vignettes/quickstart.html
library(htr)

q = "rs4284742,rs2070901,rs123"
corr = 0.8 # optional
ld_method = "r2" # optional

url = paste('http://www.genehopper.de/rest/qtlizer?q=', q, "&corr=", corr,
"&ld_method=", ld_method, sep="")

response = POST(url);
result = content(response)

a = unlist(strsplit(result , "\n\t"))
m = matrix(a[20:length(a)], ncol=19, byrow=TRUE)
d = as.data.frame(m, stringsAsFactors=FALSE)
colnames(d) = a[1:19]

write.table(d, file="example.txt", sep="\t", quote = FALSE, append=FALSE,
row.names = FALSE, col.names = TRUE)
```

**Supplementary Figure 2.** For larger queries Qtlizer can be accessed using the Genehopper REST API. The script describes an example request in **R**. More info about the API can be found at <http://www.genehopper.de/rest>.

```
#!/usr/bin/perl

use warnings;
use strict;
use LWP::UserAgent;

my $url = 'http://www.genehopper.de/rest/qtlizer!';

my %parameters = (
    "q" => "rs4284742, rs2070901, rs123",
    "corr" => 0.8, # optional
    "ld_method" => "r2" # optional
);

my $url_with_pars = "$url?";
$url_with_pars .= $_."=".$parameters{$_}."&" for keys(%parameters);

my $ua = LWP::UserAgent->new();
my $response = $ua -> post($url_with_pars);
my $content = $response -> decoded_content();

print $content."\n";
```

**Supplementary Figure 3.** The script describes an example request in **Perl** (<http://www.genehopper.de/rest>).

**Supplementary Table 1.** List of QTL datasets that were integrated into Qtlizer.

| Source                        | PMID     | Tissue                                                          | QTL Type | #Variants |
|-------------------------------|----------|-----------------------------------------------------------------|----------|-----------|
| Blood eQTL Browser            | 24013639 | Peripheral blood                                                | eQTL     | 768850    |
| Franzén et al. (Science 2016) | 27540175 | Adipose - Subcutaneous                                          | eQTL     | 6776      |
| Franzén et al. (Science 2016) | 27540175 | Adipose - Visceral (Abdominal)                                  | eQTL     | 6697      |
| Franzén et al. (Science 2016) | 27540175 | Adrenal gland                                                   | eQTL     | 1         |
| Franzén et al. (Science 2016) | 27540175 | Artery - Aorta                                                  | eQTL     | 288       |
| Franzén et al. (Science 2016) | 27540175 | Artery - Mammary                                                | eQTL     | 7109      |
| Franzén et al. (Science 2016) | 27540175 | Artery - Tibial                                                 | eQTL     | 12        |
| Franzén et al. (Science 2016) | 27540175 | Atherosclerotic aortic root                                     | eQTL     | 6958      |
| Franzén et al. (Science 2016) | 27540175 | Blood                                                           | eQTL     | 5591      |
| Franzén et al. (Science 2016) | 27540175 | Brain - Hypothalamus                                            | eQTL     | 2         |
| Franzén et al. (Science 2016) | 27540175 | Brain - Nucleus accumbens (Basal ganglia)                       | eQTL     | 2         |
| Franzén et al. (Science 2016) | 27540175 | Brain - Putamen (Basal ganglia)                                 | eQTL     | 11        |
| Franzén et al. (Science 2016) | 27540175 | Cells - Transformed fibroblasts                                 | eQTL     | 658       |
| Franzén et al. (Science 2016) | 27540175 | Colon - Transverse                                              | eQTL     | 18        |
| Franzén et al. (Science 2016) | 27540175 | Esophagus - Mucosa                                              | eQTL     | 976       |
| Franzén et al. (Science 2016) | 27540175 | Esophagus - Muscularis                                          | eQTL     | 15        |
| Franzén et al. (Science 2016) | 27540175 | Heart - Left ventricle                                          | eQTL     | 3         |
| Franzén et al. (Science 2016) | 27540175 | Liver                                                           | eQTL     | 7043      |
| Franzén et al. (Science 2016) | 27540175 | Lung                                                            | eQTL     | 98        |
| Franzén et al. (Science 2016) | 27540175 | Muscle skeletal                                                 | eQTL     | 5650      |
| Franzén et al. (Science 2016) | 27540175 | Nerve - Tibial                                                  | eQTL     | 30        |
| Franzén et al. (Science 2016) | 27540175 | Pancreas                                                        | eQTL     | 283       |
| Franzén et al. (Science 2016) | 27540175 | Prostate                                                        | eQTL     | 1         |
| Franzén et al. (Science 2016) | 27540175 | Skin - Not sun exposed (Suprapubic)                             | eQTL     | 11        |
| Franzén et al. (Science 2016) | 27540175 | Skin - Sun exposed (Lower leg)                                  | eQTL     | 64        |
| Franzén et al. (Science 2016) | 27540175 | Testis                                                          | eQTL     | 203       |
| Franzén et al. (Science 2016) | 27540175 | Thyroid                                                         | eQTL     | 2120      |
| Franzén et al. (Science 2016) | 27540175 | Whole blood                                                     | eQTL     | 35        |
| GEUVADIS                      | 24037378 | Cells - Lymphoblastoid cell lines                               | eQTL     | 404608    |
| GRASP 2 Catalog               | 17873877 | Cells - Lymphoblastoid cell lines                               | eQTL     | 8417      |
| GRASP 2 Catalog               | 18193047 | Cells - Lymphoblastoid cell lines                               | eQTL     | 463       |
| GRASP 2 Catalog               | 18478092 | Cells - Leukemia cells                                          | eQTL     | 6         |
| GRASP 2 Catalog               | 18478092 | Cells - Normal peripheral leukocytes                            | eQTL     | 6         |
| GRASP 2 Catalog               | 19128478 | Blood cells in celiac disease                                   | eQTL     | 2812      |
| GRASP 2 Catalog               | 19222302 | Brain - Cortex                                                  | eQTL     | 1281      |
| GRASP 2 Catalog               | 19222302 | Cells - Peripheral blood mononuclear cells                      | eQTL     | 2420      |
| GRASP 2 Catalog               | 19361613 | Brain - Cortex with alzheimer's interaction                     | eQTL     | 252       |
| GRASP 2 Catalog               | 19361613 | Brain - Cortex with no alzheimer's interaction                  | eQTL     | 1117      |
| GRASP 2 Catalog               | 19644074 | Cells - Fibroblasts                                             | eQTL     | 512       |
| GRASP 2 Catalog               | 19644074 | Cells - Lymphoblastoid cell lines                               | eQTL     | 551       |
| GRASP 2 Catalog               | 19644074 | Cells - T cells                                                 | eQTL     | 532       |
| GRASP 2 Catalog               | 19654370 | Osteoblasts                                                     | eQTL     | 711       |
| GRASP 2 Catalog               | 19680542 | Cells - Lymphoblastoid cell lines                               | eQTL     | 73        |
| GRASP 2 Catalog               | 19680542 | Osteoblasts                                                     | eQTL     | 133       |
| GRASP 2 Catalog               | 19966804 | Cells - Peripheral leukocytes                                   | eQTL     | 215       |
| GRASP 2 Catalog               | 20084173 | Liver                                                           | eQTL     | 49        |
| GRASP 2 Catalog               | 20170901 | Cells - Aortic endothelial cells                                | eQTL     | 5         |
| GRASP 2 Catalog               | 20170901 | Cells - Aortic endothelial cells treated with OX-PAPC           | eQTL     | 35        |
| GRASP 2 Catalog               | 20351726 | Brain - Prefrontal cortex                                       | eQTL     | 3035      |
| GRASP 2 Catalog               | 20833654 | Cells - CD4+ lymphocytes                                        | eQTL     | 6843      |
| GRASP 2 Catalog               | 20844574 | Blood                                                           | eQTL     | 9         |
| GRASP 2 Catalog               | 21226949 | Endometrial tumors                                              | eQTL     | 229       |
| GRASP 2 Catalog               | 21637794 | Liver                                                           | eQTL     | 7970      |
| GRASP 2 Catalog               | 21789213 | Cells - Lymphoblastoid cell lines                               | eQTL     | 8         |
| GRASP 2 Catalog               | 21829388 | Adipose - Subcutaneous (Abdominal)                              | eQTL     | 3         |
| GRASP 2 Catalog               | 21829388 | Adipose - Visceral (Omentum majus)                              | eQTL     | 6         |
| GRASP 2 Catalog               | 21829388 | Blood                                                           | eQTL     | 86912     |
| GRASP 2 Catalog               | 21829388 | Musculus rectus - Abdominis                                     | eQTL     | 3         |
| GRASP 2 Catalog               | 21949713 | Sputum                                                          | eQTL     | 2047      |
| GRASP 2 Catalog               | 22006096 | Liver                                                           | eQTL     | 1376      |
| GRASP 2 Catalog               | 22233810 | Cells - Dendritic cells                                         | eQTL     | 9434      |
| GRASP 2 Catalog               | 22233810 | Cells - Dendritic cells treated with mycobacterium tuberculosis | eQTL     | 9488      |
| GRASP 2 Catalog               | 22383892 | Adipose - Gluteal                                               | eQTL     | 11        |
| GRASP 2 Catalog               | 22383892 | Adipose - Subcutaneous (Abdominal)                              | eQTL     | 30        |
| GRASP 2 Catalog               | 22447449 | Liver and corresponding expression modules                      | eQTL     | 28        |
| GRASP 2 Catalog               | 22447449 | Liver                                                           | eQTL     | 1         |
| GRASP 2 Catalog               | 22509407 | Whole blood in amyotrophic lateral sclerosis cases and controls | eQTL     | 15        |

|                 |          |                                                                   |      |         |
|-----------------|----------|-------------------------------------------------------------------|------|---------|
| GRASP 2 Catalog | 22522925 | Breast tumors                                                     | eQTL | 2981    |
| GRASP 2 Catalog | 22685416 | Brain - Cerebellum in alzheimer's disease cases and controls      | eQTL | 20554   |
| GRASP 2 Catalog | 22685416 | Brain - Cerebellum in alzheimer's disease cases                   | eQTL | 3541    |
| GRASP 2 Catalog | 22685416 | Brain - Cerebellum in non-alzheimer's disease samples             | eQTL | 3107    |
| GRASP 2 Catalog | 22685416 | Brain - Cerebellum in progressive supranuclear palsy cases        | eQTL | 1610    |
| GRASP 2 Catalog | 22685416 | Brain - Temporal cortex in alzheimer's disease cases and controls | eQTL | 20069   |
| GRASP 2 Catalog | 22685416 | Brain - Temporal cortex in alzheimer's disease cases              | eQTL | 3204    |
| GRASP 2 Catalog | 22685416 | Brain - Temporal cortex in non-alzheimer's disease samples        | eQTL | 1747    |
| GRASP 2 Catalog | 22685416 | Brain - Temporal cortex in progressive supranuclear palsy cases   | eQTL | 1117    |
| GRASP 2 Catalog | 22692066 | Whole blood                                                       | eQTL | 1470    |
| GRASP 2 Catalog | 22912676 | Cells - B-lymphoblastoid cell lines                               | eQTL | 25      |
| GRASP 2 Catalog | 23474282 | Ileum - Pre-pouch                                                 | eQTL | 71037   |
| GRASP 2 Catalog | 23671422 | Cells - Fibroblasts                                               | eQTL | 1       |
| GRASP 2 Catalog | 23671422 | Cells - Fibroblasts, T cells and B-lymphoblastoid cell lines      | eQTL | 2       |
| GTEEx v7        | 23715323 | Adipose - Subcutaneous                                            | eQTL | 1492748 |
| GTEEx v7        | 23715323 | Adipose - Visceral (Omentum)                                      | eQTL | 989804  |
| GTEEx v7        | 23715323 | Adrenal gland                                                     | eQTL | 521055  |
| GTEEx v7        | 23715323 | Artery - Aorta                                                    | eQTL | 1034149 |
| GTEEx v7        | 23715323 | Artery - Coronary                                                 | eQTL | 338471  |
| GTEEx v7        | 23715323 | Artery - Tibial                                                   | eQTL | 1547788 |
| GTEEx v7        | 23715323 | Brain - Amygdala                                                  | eQTL | 150681  |
| GTEEx v7        | 23715323 | Brain - Anterior cingulate cortex (BA24)                          | eQTL | 276912  |
| GTEEx v7        | 23715323 | Brain - Caudate (Basal ganglia)                                   | eQTL | 414047  |
| GTEEx v7        | 23715323 | Brain - Cerebellar hemisphere                                     | eQTL | 543823  |
| GTEEx v7        | 23715323 | Brain - Cerebellum                                                | eQTL | 780268  |
| GTEEx v7        | 23715323 | Brain - Cortex                                                    | eQTL | 455391  |
| GTEEx v7        | 23715323 | Brain - Frontal cortex (BA9)                                      | eQTL | 327068  |
| GTEEx v7        | 23715323 | Brain - Hippocampus                                               | eQTL | 211589  |
| GTEEx v7        | 23715323 | Brain - Hypothalamus                                              | eQTL | 214764  |
| GTEEx v7        | 23715323 | Brain - Nucleus accumbens (Basal ganglia)                         | eQTL | 357772  |
| GTEEx v7        | 23715323 | Brain - Putamen (Basal ganglia)                                   | eQTL | 278404  |
| GTEEx v7        | 23715323 | Brain - Spinal cord (Cervical c-1)                                | eQTL | 167028  |
| GTEEx v7        | 23715323 | Brain - Substantia nigra                                          | eQTL | 112251  |
| GTEEx v7        | 23715323 | Breast - Mammary tissue                                           | eQTL | 695994  |
| GTEEx v7        | 23715323 | Cells - EBV-transformed lymphocytes                               | eQTL | 271398  |
| GTEEx v7        | 23715323 | Cells - Transformed fibroblasts                                   | eQTL | 1278165 |
| GTEEx v7        | 23715323 | Colon - Sigmoid                                                   | eQTL | 661130  |
| GTEEx v7        | 23715323 | Colon - Transverse                                                | eQTL | 784629  |
| GTEEx v7        | 23715323 | Esophagus - Gastroesophageal junction                             | eQTL | 697016  |
| GTEEx v7        | 23715323 | Esophagus - Mucosa                                                | eQTL | 1474044 |
| GTEEx v7        | 23715323 | Esophagus - Muscularis                                            | eQTL | 1384504 |
| GTEEx v7        | 23715323 | Heart - Atrial appendage                                          | eQTL | 841069  |
| GTEEx v7        | 23715323 | Heart - Left ventricle                                            | eQTL | 740015  |
| GTEEx v7        | 23715323 | Liver                                                             | eQTL | 305452  |
| GTEEx v7        | 23715323 | Lung                                                              | eQTL | 1385916 |
| GTEEx v7        | 23715323 | Minor salivary gland                                              | eQTL | 125852  |
| GTEEx v7        | 23715323 | Muscle skeletal                                                   | eQTL | 1438236 |
| GTEEx v7        | 23715323 | Nerve - Tibial                                                    | eQTL | 1837615 |
| GTEEx v7        | 23715323 | Ovary                                                             | eQTL | 262592  |
| GTEEx v7        | 23715323 | Pancreas                                                          | eQTL | 696296  |
| GTEEx v7        | 23715323 | Pituitary                                                         | eQTL | 552811  |
| GTEEx v7        | 23715323 | Prostate                                                          | eQTL | 283528  |
| GTEEx v7        | 23715323 | Skin - Not sun exposed (Suprapubic)                               | eQTL | 1250843 |
| GTEEx v7        | 23715323 | Skin - Sun exposed (Lower leg)                                    | eQTL | 1697927 |
| GTEEx v7        | 23715323 | Small intestine - Terminal ileum                                  | eQTL | 302654  |
| GTEEx v7        | 23715323 | Spleen                                                            | eQTL | 494717  |
| GTEEx v7        | 23715323 | Stomach                                                           | eQTL | 596021  |
| GTEEx v7        | 23715323 | Testis                                                            | eQTL | 1417129 |
| GTEEx v7        | 23715323 | Thyroid                                                           | eQTL | 2017804 |
| GTEEx v7        | 23715323 | Uterus                                                            | eQTL | 169796  |
| GTEEx v7        | 23715323 | Vagina                                                            | eQTL | 167241  |
| GTEEx v7        | 23715323 | Whole blood                                                       | eQTL | 1001052 |
| Haploreg v4.1   | 17873874 | Cells - Lymphoblastoid cell lines                                 | eQTL | 9979    |
| Haploreg v4.1   | 18462017 | Liver                                                             | eQTL | 3603    |
| Haploreg v4.1   | 20220756 | Cells - Lymphoblastoid cell lines                                 | eQTL | 2049    |
| Haploreg v4.1   | 20485568 | Brain - Cerebellum                                                | eQTL | 5233    |
| Haploreg v4.1   | 20485568 | Brain - Frontal cortex                                            | eQTL | 5422    |
| Haploreg v4.1   | 20485568 | Brain - Pons                                                      | eQTL | 3377    |
| Haploreg v4.1   | 20485568 | Brain - Temporal cortex                                           | eQTL | 5204    |
| Haploreg v4.1   | 21283786 | Osteoblasts BMP2                                                  | eQTL | 1533    |

|                               |          |                                                                  |       |         |
|-------------------------------|----------|------------------------------------------------------------------|-------|---------|
| Haploreg v4.1                 | 21283786 | Osteoblasts DEX                                                  | eQTL  | 1248    |
| Haploreg v4.1                 | 21283786 | Osteoblasts                                                      | eQTL  | 1089    |
| Haploreg v4.1                 | 21283786 | Osteoblasts PGE2                                                 | eQTL  | 1519    |
| Haploreg v4.1                 | 23209423 | Lung                                                             | eQTL  | 14977   |
| Haploreg v4.1                 | 24604202 | Cells - Monocytes                                                | eQTL  | 5982    |
| Haploreg v4.1                 | 24604202 | Cells - Monocytes IFN                                            | eQTL  | 9570    |
| Haploreg v4.1                 | 24604202 | Cells - Monocytes LPS24                                          | eQTL  | 2458    |
| Haploreg v4.1                 | 24604202 | Cells - Monocytes LPS2                                           | eQTL  | 3864    |
| Haploreg v4.1                 | 24846176 | Heart                                                            | eQTL  | 5627    |
| Haploreg v4.1                 | 25174004 | Brain - Aveal                                                    | eQTL  | 10597   |
| Haploreg v4.1                 | 25174004 | Brain - Cerebellum                                               | eQTL  | 2094    |
| Haploreg v4.1                 | 25174004 | Brain - Frontal cortex                                           | eQTL  | 1200    |
| Haploreg v4.1                 | 25174004 | Brain - Hippocampus                                              | eQTL  | 1003    |
| Haploreg v4.1                 | 25174004 | Brain - Inferior olivary nucleus                                 | eQTL  | 831     |
| Haploreg v4.1                 | 25174004 | Brain - Intralobular white matter                                | eQTL  | 1515    |
| Haploreg v4.1                 | 25174004 | Brain - Occipital cortex                                         | eQTL  | 954     |
| Haploreg v4.1                 | 25174004 | Brain - Putamen                                                  | eQTL  | 550     |
| Haploreg v4.1                 | 25174004 | Brain - Substantia nigra                                         | eQTL  | 415     |
| Haploreg v4.1                 | 25174004 | Brain - Temporal Cortex                                          | eQTL  | 1391    |
| Haploreg v4.1                 | 25174004 | Brain - Thalamus                                                 | eQTL  | 841     |
| Kim et al. (Nature Comm 2017) | 28814792 | Cells - Monocytes                                                | eQTL  | 2403    |
| Kim et al. (Nature Comm 2017) | 28814792 | Cells - Monocytes (stimulated with LPS/IVT/MDP vs. unstimulated) | reQTL | 369     |
| pGWAS                         | 28240269 | Blood plasma                                                     | pQTL  | 508     |
| ScanDB                        | 19933162 | Brain - Cerebellum                                               | eQTL  | 621247  |
| ScanDB                        | 19933162 | Brain - Parietal lobe                                            | eQTL  | 592490  |
| ScanDB                        | 19933162 | Liver                                                            | eQTL  | 285990  |
| seeQTL                        | 17982457 | Brain                                                            | eQTL  | 39154   |
| seeQTL                        | 22171328 | Cells - Lymphoblastoid cell lines                                | eQTL  | 123727  |
| The Cardiogenics Project      | 23382694 | Cells - Monocytes                                                | eQTL  | 1329875 |
| The Cardiogenics Project      | 27558669 | Cells - Macrophages                                              | eQTL  | 1032604 |
| Zeller et al. (PlosONE 2010)  | 20502693 | Cells - Monocytes                                                | eQTL  | 203642  |

**Supplementary Table 2. Members of the Cardiogenics Consortium.**

|                        |                        |
|------------------------|------------------------|
| Tony Attwood           | Seraya Maouche         |
| Stephanie Belz         | Jasbir S Moore         |
| Peter Braund           | Gilles Montalescot     |
| Jessy Brocheton        | David Muir             |
| François Cambien       | Elizabeth Murray       |
| Jason Cooper           | Chris P Nelson         |
| Abi Crisp-Hihn         | Jessica Neudert        |
| Panos Deloukas         | David Niblett          |
| Patrick Diemert        | Karen O'Leary          |
| Jeannette Erdmann      | Willem H. Ouwehand     |
| Nicola Foad            | Helen Pollard          |
| Tiphaine Godefroy      | Carole Proust          |
| Alison H. Goodall      | Angela Rankin          |
| Jay Gracey             | Augusto Rendon         |
| Emma Gray              | Catherine M Rice       |
| Rhian Gwilliams        | Hendrik Sager          |
| Susanne Heimerl        | Nilesh J. Samani       |
| Christian Hengstenberg | Jennifer Sambrook      |
| Jennifer Jolley        | Gerd Schmitz           |
| Unni Krishnan          | Michael Scholz         |
| Heather Lloyd-Jones    | Laura Schroeder        |
| Ulrika Liljedahl       | Heribert Schunkert     |
| Ingrid Lugauer         | Jonathan Stephens      |
| Per Lundmark           | Ann-Christine Syvannen |
| Chris Wallace          | Stefanie Tennstedt     |
